# Supplementary material for: Identification and Safety Assessment of Enterococcus casseliflavus KB1733 Isolated from Traditional Japanese Pickle Based on Whole-Genome Sequencing Analysis and Preclinical Toxicity Studies
Source: MDPI journal article supplement (doi:10.3390/microorganisms12050953), 2024-05-08
Supplement: s1 [file s1]

**Supplementary Table S1.** The regions of the possible horizontal gene transfers in the chromosome of *Enterococcus casseliflavus* KB1733 <sup>1</sup>.

| No | Start     | Stop      | Score | Threshold | No | Start     | Stop      | Score | Threshold |
|----|-----------|-----------|-------|-----------|----|-----------|-----------|-------|-----------|
| 1  | 100,000   | 105,000   | 0.18  | 14.762    | 20 | 1,945,000 | 1,952,500 | 0.285 | 14.762    |
| 2  | 112,500   | 117,500   | 0.217 | 14.762    | 21 | 1,957,500 | 1,987,500 | 0.636 | 14.762    |
| 3  | 130,000   | 135,000   | 0.161 | 14.762    | 22 | 2,327,500 | 2,347,500 | 0.38  | 14.762    |
| 4  | 272,500   | 277,500   | 0.261 | 14.762    | 23 | 2,462,500 | 2,467,500 | 0.162 | 14.762    |
| 5  | 280,000   | 295,000   | 0.197 | 14.762    | 24 | 2,485,000 | 2,495,000 | 0.35  | 14.762    |
| 6  | 532,500   | 542,500   | 0.296 | 14.762    | 25 | 2,512,500 | 2,530,000 | 0.266 | 14.762    |
| 7  | 567,500   | 575,000   | 0.219 | 14.762    | 26 | 2,532,500 | 2,550,000 | 0.256 | 14.762    |
| 8  | 670,000   | 685,000   | 0.382 | 14.762    | 27 | 2,740,000 | 2,745,000 | 0.167 | 14.762    |
| 9  | 765,000   | 802,500   | 0.371 | 14.762    | 28 | 3,230,000 | 3,242,500 | 0.353 | 14.762    |
| 10 | 812,500   | 817,500   | 0.158 | 14.762    | 29 | 3,297,500 | 3,302,500 | 0.198 | 14.762    |
| 11 | 835,000   | 842,500   | 0.237 | 14.762    | 30 | 3,327,500 | 3,350,000 | 0.337 | 14.762    |
| 12 | 1,022,500 | 1,030,000 | 0.168 | 14.762    | 31 | 3,365,000 | 3,370,000 | 0.183 | 14.762    |
| 13 | 1,105,000 | 1,115,000 | 0.159 | 14.762    | 32 | 3,372,500 | 3,377,500 | 0.167 | 14.762    |
| 14 | 1,167,500 | 1,172,500 | 0.24  | 14.762    | 33 | 3,385,000 | 3,395,000 | 0.392 | 14.762    |
| 15 | 1,247,500 | 1,267,500 | 0.409 | 14.762    | 34 | 3,397,500 | 3,405,000 | 0.201 | 14.762    |
| 16 | 1,520,000 | 1,527,500 | 0.251 | 14.762    | 35 | 3,412,500 | 3,420,000 | 0.205 | 14.762    |
| 17 | 1,685,000 | 1,707,500 | 0.21  | 14.762    | 36 | 3,437,500 | 3,445,000 | 0.171 | 14.762    |
| 18 | 1,712,500 | 1,737,500 | 0.234 | 14.762    | 37 | 3,475,000 | 3,485,000 | 0.337 | 14.762    |
| 19 | 1,740,000 | 1,745,000 | 0.215 | 14.762    | 38 | 3,502,500 | 3,510,000 | 0.269 | 14.762    |

<sup>1</sup> The contigs in the chromosome of *E. casseliflavus* KB1733 with a score below or above the threshold are provided by Alien Hunter (version 1.1.0).

**Supplementary Table S2.** Individual animal weight at day 0, day 7 and day 14.<sup>1</sup>

|     | Animal weight (g) |       |        |
|-----|-------------------|-------|--------|
|     | Day 0             | Day 7 | Day 14 |
| M 1 | 184               | 267   | 323    |
| M 2 | 190               | 283   | 346    |
| M 3 | 185               | 262   | 316    |
| M 4 | 184               | 261   | 316    |
| M 5 | 195               | 289   | 351    |
| F 1 | 156               | 202   | 242    |
| F 2 | 147               | 193   | 222    |
| F 3 | 150               | 190   | 214    |
| F 4 | 153               | 191   | 222    |
| F 5 | 152               | 200   | 235    |

<sup>1</sup> Abbreviations: M1–M5, males; F1–F5, females.
